# Supplementary material for: Pan-Cancer Drug Sensitivity Prediction from Gene Expression using Deep Learning
Source: bioRxiv preprint, doi:10.1101/2024.11.15.623715, version 1 (2024-11-15)
Supplement: Table S12 [file 623715_file03.pdf]

|          | Compound     | IC50 (actual) | t-test score | SSeq1.0 prediction estimate | SSeq1.0 predicted score | SSeq2.0 prediction estimate | SSeq2.0 predicted score |
|----------|--------------|---------------|--------------|-----------------------------|-------------------------|-----------------------------|-------------------------|
|          | afatinib     | 1.88          | 1            | 0.142782380                 | 0                       | 0.538184198                 | 1                       |
| C4-28    | afatinib     | 5.45          | 0            | 0.149451077                 | 0                       | 0.690935493                 | 1                       |
| DJ145    | afatinib     | 2.25          | 1            | 0.149314344                 | 0                       | 0.542400181                 | 1                       |
| UNCaP    | afatinib     | 1.22          | 1            | 0.071935117                 | 0                       | 0.689906955                 | 1                       |
| NCI-H660 | afatinib     | 7.82          | 0            | 0.021622747                 | 0                       | 0.538164198                 | 1                       |
| PC3      | afatinib     | 3.95          | 1            | 0.206208199                 | 0                       | 0.561330438                 | 1                       |
| RWPE-1   | afatinib     | 0.09          | 1            | 0.384666979                 | 0                       | 0.538164198                 | 1                       |
| VCaP     | afatinib     | 23.6          | 0            | 0.049034894                 | 0                       | 0.539431930                 | 1                       |
| 22Rv1    | alisertib    | 30            | 0            | 0.413455201                 | 0                       | 0.558874667                 | 1                       |
| C4-28    | alisertib    | 30            | 0            | 0.582531710                 | 1                       | 0.711332798                 | 1                       |
| DJ145    | alisertib    | 13.45         | 0            | 0.217999965                 | 0                       | 0.558874667                 | 1                       |
| UNCaP    | alisertib    | 20.59         | 0            | 0.355319440                 | 0                       | 0.705398202                 | 1                       |
| NCI-H660 | alisertib    | 30            | 0            | 0.586519897                 | 1                       | 0.558874667                 | 1                       |
| PC3      | alisertib    | 16.94         | 0            | 0.107419848                 | 0                       | 0.560064554                 | 1                       |
| RWPE-1   | alisertib    | 10.06         | 0            | 0.288422067                 | 0                       | 0.558874667                 | 1                       |
| VCaP     | alisertib    | 30            | 0            | 0.297763586                 | 0                       | 0.560448468                 | 1                       |
| 22Rv1    | alvociclib   | 0.06          | 1            | 0.917779446                 | 1                       | 0.897899508                 | 1                       |
| C4-28    | alvociclib   | 0             | 1            | 0.936987877                 | 1                       | 0.957896471                 | 1                       |
| DJ145    | alvociclib   | 0             | 1            | 0.878314674                 | 1                       | 0.901111364                 | 1                       |
| UNCaP    | alvociclib   | 0             | 1            | 0.894802180                 | 1                       | 0.957792997                 | 1                       |
| NCI-H660 | alvociclib   | 30            | 0            | 0.822813869                 | 1                       | 0.897899508                 | 1                       |
| PC3      | alvociclib   | 0             | 1            | 0.807090402                 | 1                       | 0.915017545                 | 1                       |
| RWPE-1   | alvociclib   | 0             | 1            | 0.908599854                 | 1                       | 0.897899508                 | 1                       |
| VCaP     | alvociclib   | 0             | 1            | 0.826730430                 | 1                       | 0.900076807                 | 1                       |
| 22Rv1    | anisomycin   | 0             | 1            | 0.535568986                 | 1                       | 0.780103922                 | 1                       |
| C4-28    | anisomycin   | 0             | 1            | 0.609309793                 | 0                       | 0.899583340                 | 1                       |
| DJ145    | anisomycin   | 0.01          | 1            | 0.393346429                 | 0                       | 0.783417702                 | 1                       |
| UNCaP    | anisomycin   | 0.01          | 1            | 0.485879332                 | 0                       | 0.899318457                 | 1                       |
| NCI-H660 | anisomycin   | 30            | 0            | 0.427598000                 | 0                       | 0.780103922                 | 1                       |
| PC3      | anisomycin   | 0.08          | 1            | 0.283856273                 | 0                       | 0.805271149                 | 1                       |
| RWPE-1   | anisomycin   | 0.01          | 1            | 0.433127880                 | 0                       | 0.780103922                 | 1                       |
| VCaP     | anisomycin   | 5.12          | 0            | 0.429514557                 | 0                       | 0.780978084                 | 1                       |
| 22Rv1    | BI-2536      | 0             | 1            | 0.943608165                 | 1                       | 0.874229670                 | 1                       |
| C4-28    | BI-2536      | 0             | 1            | 0.958806992                 | 1                       | 0.947653890                 | 1                       |
| DJ145    | BI-2536      | 0             | 1            | 0.910637140                 | 1                       | 0.878232718                 | 1                       |
| UNCaP    | BI-2536      | 0             | 1            | 0.925457656                 | 1                       | 0.947536826                 | 1                       |
| NCI-H660 | BI-2536      | 4.45          | 1            | 0.883519888                 | 1                       | 0.874229670                 | 1                       |
| PC3      | BI-2536      | 0             | 1            | 0.811250925                 | 1                       | 0.894525409                 | 1                       |
| RWPE-1   | BI-2536      | 0             | 1            | 0.935109138                 | 0                       | 0.874229670                 | 1                       |
| VCaP     | BI-2536      | 0             | 1            | 0.876823068                 | 1                       | 0.876939058                 | 1                       |
| 22Rv1    | cabazitaxel  | 30            | 0            | 0.725094736                 | 1                       | 0.955084205                 | 1                       |
| C4-28    | cabazitaxel  | 0             | 1            | 0.769216478                 | 1                       | 0.982285380                 | 1                       |
| DJ145    | cabazitaxel  | 0             | 1            | 0.679298043                 | 1                       | 0.958569666                 | 1                       |
| UNCaP    | cabazitaxel  | 0             | 1            | 0.684690356                 | 1                       | 0.982240796                 | 1                       |
| NCI-H660 | cabazitaxel  | 30            | 0            | 0.514086246                 | 1                       | 0.955084205                 | 1                       |
| PC3      | cabazitaxel  | 0             | 1            | 0.614886549                 | 1                       | 0.963878632                 | 1                       |
| RWPE-1   | cabazitaxel  | 0             | 1            | 0.710921526                 | 1                       | 0.955084205                 | 1                       |
| VCaP     | cabazitaxel  | 0             | 1            | 0.597862449                 | 1                       | 0.956288099                 | 1                       |
| 22Rv1    | cladribine   | 0.31          | 1            | 0.518917680                 | 1                       | 0.752118945                 | 1                       |
| C4-28    | cladribine   | 0.12          | 1            | 0.578958452                 | 1                       | 0.878757596                 | 1                       |
| DJ145    | cladribine   | 1.85          | 1            | 0.367065161                 | 0                       | 0.755814433                 | 1                       |
| UNCaP    | cladribine   | 0.14          | 1            | 0.410308838                 | 0                       | 0.878445268                 | 1                       |
| NCI-H660 | cladribine   | 180           | 0            | 0.276999652                 | 0                       | 0.752118945                 | 1                       |
| PC3      | cladribine   | 22.39         | 0            | 0.266851485                 | 0                       | 0.752966881                 | 1                       |
| RWPE-1   | cladribine   | 0.28          | 1            | 0.438352138                 | 0                       | 0.752118945                 | 1                       |
| VCaP     | cladribine   | 30            | 0            | 0.345004648                 | 0                       | 0.753345115                 | 1                       |
| 22Rv1    | danusertib   | 30            | 0            | 0.07794854                  | 0                       | 0.767408252                 | 1                       |
| C4-28    | danusertib   | 0             | 1            | 0.091372281                 | 0                       | 0.890387833                 | 1                       |
| DJ145    | danusertib   | 1.22          | 1            | 0.048509479                 | 0                       | 0.770642757                 | 1                       |
| UNCaP    | danusertib   | 0             | 1            | 0.071571082                 | 0                       | 0.890101612                 | 1                       |
| NCI-H660 | danusertib   | 30            | 0            | 0.087356687                 | 0                       | 0.767408252                 | 1                       |
| PC3      | danusertib   | 45.37         | 0            | 0.029868245                 | 0                       | 0.768267870                 | 1                       |
| RWPE-1   | danusertib   | 0.83          | 1            | 0.053665696                 | 0                       | 0.767408252                 | 1                       |
| VCaP     | danusertib   | 30            | 0            | 0.077480647                 | 0                       | 0.768509865                 | 1                       |
| 22Rv1    | dasatinib    | 24.63         | 0            | 0.672664464                 | 1                       | 0.587255418                 | 1                       |
| C4-28    | dasatinib    | 11.85         | 0            | 0.680742025                 | 1                       | 0.742329836                 | 1                       |
| DJ145    | dasatinib    | 0.21          | 1            | 0.683224559                 | 1                       | 0.501964960                 | 1                       |
| UNCaP    | dasatinib    | 14.86         | 0            | 0.583333731                 | 1                       | 0.738205552                 | 1                       |
| NCI-H660 | dasatinib    | 30            | 0            | 0.148270190                 | 0                       | 0.587255418                 | 1                       |
| PC3      | dasatinib    | 22.74         | 0            | 0.652873993                 | 0                       | 0.588304222                 | 1                       |
| RWPE-1   | dasatinib    | 0.48          | 1            | 0.708958447                 | 1                       | 0.587255418                 | 1                       |
| VCaP     | dasatinib    | 30            | 0            | 0.293738723                 | 0                       | 0.588645995                 | 1                       |
| 22Rv1    | delanzomib   | 3.31          | 1            | 0.515109599                 | 1                       | 0.944406748                 | 1                       |
| C4-28    | delanzomib   | 0             | 1            | 0.597142180                 | 1                       | 0.978011966                 | 1                       |
| DJ145    | delanzomib   | 2.98          | 1            | 0.388071824                 | 0                       | 0.946456015                 | 1                       |
| UNCaP    | delanzomib   | 0.25          | 1            | 0.461424947                 | 0                       | 0.977956831                 | 1                       |
| NCI-H660 | delanzomib   | 0.04          | 1            | 0.396050096                 | 0                       | 0.944406748                 | 1                       |
| PC3      | delanzomib   | 5.48          | 0            | 0.260596907                 | 0                       | 0.944864273                 | 1                       |
| RWPE-1   | delanzomib   | 0             | 1            | 0.425655454                 | 0                       | 0.944406748                 | 1                       |
| VCaP     | delanzomib   | 0             | 1            | 0.403796315                 | 0                       | 0.945749938                 | 1                       |
| 22Rv1    | docetaxel    | 0             | 1            | 0.743937314                 | 1                       | 0.805332005                 | 1                       |
| C4-28    | docetaxel    | 0             | 1            | 0.759613454                 | 1                       | 0.915802717                 | 1                       |
| DJ145    | docetaxel    | 0             | 1            | 0.734765053                 | 1                       | 0.810435236                 | 1                       |
| UNCaP    | docetaxel    | 0             | 1            | 0.704077244                 | 1                       | 0.915620685                 | 1                       |
| NCI-H660 | docetaxel    | 30            | 0            | 0.272650301                 | 0                       | 0.805332005                 | 1                       |
| PC3      | docetaxel    | 0             | 1            | 0.699551582                 | 1                       | 0.832469940                 | 1                       |
| RWPE-1   | docetaxel    | 0             | 1            | 0.754433155                 | 1                       | 0.805332005                 | 1                       |
| VCaP     | docetaxel    | 0             | 1            | 0.562275946                 | 1                       | 0.808715940                 | 1                       |
| 22Rv1    | doxorubicin  | 1.76          | 1            | 0.917484283                 | 1                       | 0.933674097                 | 1                       |
| C4-28    | doxorubicin  | 2.32          | 1            | 0.937280893                 | 1                       | 0.973536968                 | 1                       |
| DJ145    | doxorubicin  | 2.67          | 1            | 0.873442113                 | 1                       | 0.935079366                 | 1                       |
| UNCaP    | doxorubicin  | 0.7           | 1            | 0.891810477                 | 1                       | 0.973470867                 | 1                       |
| NCI-H660 | doxorubicin  | 3.52          | 1            | 0.825995564                 | 1                       | 0.933674097                 | 1                       |
| PC3      | doxorubicin  | 2.61          | 1            | 0.796601772                 | 1                       | 0.945027560                 | 1                       |
| RWPE-1   | doxorubicin  | 0.25          | 1            | 0.905400634                 | 1                       | 0.933674097                 | 1                       |
| VCaP     | doxorubicin  | 1.83          | 1            | 0.822135806                 | 1                       | 0.935229301                 | 1                       |
| 22Rv1    | foretinib    | 0             | 1            | 0.520031989                 | 1                       | 0.626131713                 | 1                       |
| C4-28    | foretinib    | 3.94          | 1            | 0.614345908                 | 1                       | 0.776915777                 | 1                       |
| DJ145    | foretinib    | 1.15          | 1            | 0.352992982                 | 0                       | 0.630936027                 | 1                       |
| UNCaP    | foretinib    | 0             | 1            | 0.458470374                 | 0                       | 0.776169538                 | 1                       |
| NCI-H660 | foretinib    | 12            | 0            | 0.467473716                 | 0                       | 0.626131713                 | 1                       |
| PC3      | foretinib    | 0.94          | 1            | 0.245098054                 | 0                       | 0.646018824                 | 1                       |
| RWPE-1   | foretinib    | 1.8           | 1            | 0.408249021                 | 0                       | 0.626131713                 | 1                       |
| VCaP     | foretinib    | 0.168         | 1            | 0.400226921                 | 0                       | 0.629600048                 | 1                       |
| 22Rv1    | irinotecan   | 1.09          | 1            | 0.521790862                 | 1                       | 0.499655545                 | 1                       |
| C4-28    | irinotecan   | 7.7           | 0            | 0.601659656                 | 1                       | 0.657574058                 | 1                       |
| DJ145    | irinotecan   | 2.99          | 1            | 0.377734035                 | 0                       | 0.508911993                 | 1                       |
| UNCaP    | irinotecan   | 2.08          | 1            | 0.466879964                 | 0                       | 0.655854404                 | 1                       |
| NCI-H660 | irinotecan   | 30            | 0            | 0.404456347                 | 0                       | 0.499655545                 | 1                       |
| PC3      | irinotecan   | 73.7          | 0            | 0.269218087                 | 0                       | 0.499655545                 | 1                       |
| RWPE-1   | irinotecan   | 2.94          | 1            | 0.431501299                 | 0                       | 0.499655545                 | 1                       |
| VCaP     | irinotecan   | 0.21          | 1            | 0.405478597                 | 0                       | 0.504889667                 | 1                       |
| 22Rv1    | lestaurtinib | 1.02          | 1            | 0.631889641                 | 1                       | 0.720049024                 | 1                       |
| C4-28    | lestaurtinib | 0             | 1            | 0.684161921                 | 1                       | 0.857274532                 | 1                       |
| DJ145    | lestaurtinib | 0.66          | 1            | 0.616400003                 | 1                       | 0.725078881                 | 1                       |
| UNCaP    | lestaurtinib | 0.16          | 1            | 0.607629836                 | 1                       | 0.856915832                 | 1                       |
| NCI-H660 | lestaurtinib | 16.95         | 0            | 0.323508173                 | 0                       | 0.720049024                 | 1                       |
| PC3      | lestaurtinib | 0.99          | 1            | 0.486676842                 | 0                       | 0.741457582                 | 1                       |
| RWPE-1   | lestaurtinib | 0.34          | 1            | 0.621448755                 | 1                       | 0.720049024                 | 1                       |
| VCaP     | lestaurtinib | 30            | 0            | 0.479613513                 | 0                       | 0.721600533                 | 1                       |
| 22Rv1    | mitoxantrone | 0.15          | 1            | 0.999408245                 | 1                       | 0.775885582                 | 1                       |
| C4-28    | mitoxantrone | 0.3           | 1            | 0.999579608                 | 1                       | 0.896502733                 | 1                       |
| DJ145    | mitoxantrone | 0             | 1            | 0.998866916                 | 1                       | 0.778867543                 | 1                       |
| UNCaP    | mitoxantrone | 0.08          | 1            | 0.999170661                 | 1                       | 0.896283746                 | 1                       |
| NCI-H660 | mitoxantrone | 1.77          | 1            | 0.998643041                 | 1                       | 0.775885582                 | 1                       |
| PC3      | mitoxantrone | 0.68          | 1            | 0.907340024                 | 1                       | 0.799872756                 | 1                       |
| RWPE-1   | mitoxantrone | 0.22          | 1            | 0.998204518                 | 1                       | 0.775885582                 | 1                       |
| VCaP     | mitoxantrone | 0.66          | 1            | 0.998522580                 | 1                       | 0.777858913                 | 1                       |
| 22Rv1    | MK-1775      | 1.53          | 1            | 0.309861064                 | 0                       | 0.564128220                 | 1                       |
| C4-28    | MK-1775      | 0.62          | 1            | 0.371170461                 | 0                       | 0.717569947                 | 1                       |
| DJ145    | MK-1775      | 0.93          | 1            | 0.216849953                 | 0                       | 0.567659974                 | 1                       |
| UNCaP    | MK-1775      | 0.66          | 1            | 0.256115049                 | 0                       | 0.718593683                 | 1                       |
| NCI-H660 | MK-1775      | 1335.2        | 0            | 0.305694252                 | 0                       | 0.564128220                 | 1                       |
| PC3      | MK-1775      | 1.11          | 1            | 0.143258214                 | 0                       | 0.588397324                 | 1                       |
| RWPE-1   | MK-1775      | 20.97         | 0            | 0.251462638                 | 0                       | 0.564128220                 | 1                       |
| VCaP     | MK-1775      | 30            | 0            | 0.252946675                 | 0                       | 0.565177321                 | 1                       |
| 22Rv1    | MLN-0128     | 0             | 1            | 0.680450320                 | 1                       | 0.469782561                 | 1                       |
| C4-28    | MLN-0128     | 0             | 1            | 0.715497196                 | 1                       | 0.639645100                 | 1                       |
| DJ145    | MLN-0128     | 0             | 1            | 0.654029965                 | 1                       | 0.469782561                 | 0                       |
| UNCaP    | MLN-0128     | 0             | 1            | 0.651003242                 | 1                       | 0.637790620                 | 1                       |
| PC3      | MLN-0128     | 0             | 1            | 0.572612405                 | 1                       | 0.515787244                 | 1                       |
| RWPE-1   | MLN-0128     | 0             | 1            | 0.698439527                 | 1                       | 0.469782561                 | 0                       |
| VCaP     | MLN-0128     | 30            | 0            | 0.581978798                 | 0                       | 0.746449728                 | 1                       |
| 22Rv1    | panobinostat | 0.04          | 1            | 0.907586012                 | 1                       | 0.971533060                 | 1                       |
| C4-28    | panobinostat | 0.03          | 1            | 0.998270631                 | 1                       | 0.988816819                 | 1                       |
| DJ145    | panobinostat | 0             | 1            | 0.995521784                 | 1                       | 0.972703636                 | 1                       |
| UNCaP    | panobinostat | 0             | 1            | 0.996653855                 | 1                       | 0.988788247                 | 1                       |
| NCI-H660 | panobinostat | 0             | 1            | 0.994546354                 | 1                       | 0.971533060                 | 1                       |
| PC3      | panobinostat | 0.01          | 1            | 0.989740372                 | 1                       | 0.977001488                 | 1                       |
| RWPE-1   | panobinostat | 0.17          | 1            | 0.996853232                 | 1                       | 0.971533060                 | 1                       |
| VCaP     | panobinostat | 30            | 0            | 0.994156480                 | 1                       | 0.971885502                 | 1                       |
| 22Rv1    | PD-0325901   | 30            | 0            | 0.528346896                 | 1                       | 0.485723734                 | 1                       |
